# Supplementary material for: Parental Relations and Family Functioning in Non-Offending Caregivers of Abused Children
Source: Springer Nature journal article supplement (doi:10.1007/s10826-017-0972-5), 2017-12-05
Supplement: MOESM1 [file 15281608]

**SUPPLEMENTARY ONLINE TABLES**

Table 1

*Summary of correlations among study variables according to the two parental groups*

| Measures | 1 | 2 | 3 | 4 | 5 | 6 | 7 | 8 | 9 | 10 | 11 | 12 | 13 | 14 |
| --- | --- | --- | --- | --- | --- | --- | --- | --- | --- | --- | --- | --- | --- | --- |
| 1. DASS Depression 2. DASS Anxiety/Stress 3. CPRS-SF Parent-Child Conflict 4. CPRS-SF Parent-Child Closeness 5. CSI 6. SSQ6 7. FACES Cohesion 8. FACES Flexibility 9. FACES Disengagement 10. FACES Enmeshment 11. FACES Rigid 12. FACES Chaos 13. Family Communication 14. Family Satisfaction | -  .73**  .58**  -.33**  -.43**  .00  -.33**  -.20  .52**  .44**  .22*  .51**  -.22*  -.22* | .68**  -  .49**  -.19  -.27**  .02  -.20  -.05  .41**  .37**  .26*  .37**  -.02  -.06 | .39**  .28**  -  -.25*  -.19  -.03  -.28**  -.20  .44**  .37**  .18  .39**  -.07  -.11* | -.23*  -.29**  -.19  -  -.32**  -.15  .34**  .31**  -.16  .01  .12  -.03  .45**  .34** | -.10  -.06  .02  .00  -  -.04  .47**  .51**  -.31**  -.07  .05  -.27**  .59**  .44** | .17  .09  .10  -.14  .16  -  .01  -.13  .01  .01  -.03  -.01  -.09  .09 | -.14  -.20  -.04  .57**  .03  -.12  -  .78**  -.40**  -.03  .12  -.47**  .72**  .63** | -.19  -.17  .01  .46**  .29*  .01  .73**  -  -.25*  .05  .37**  -.28**  .71**  .55** | .47**  .38**  .38**  .01  -.24  .06  .11  .12  -  .57**  .28**  .75**  -.20  -.27** | .13  .14  .19  .28**  -.13  .01  .37**  .36**  .53**  -  .29**  .57**  .21*  .03 | .08  .04  .11  .34**  -.02  .04  .52**  .60**  .45**  .50**  -  .22*  .29**  .21* | .43**  .33**  .38**  -.04  -.29*  -.04  -.08  -.03  .68**  .57**  .27**  -  -.16  -.25* | -.21*  -.26*  -.15  .67**  .11  -.15  .75**  .70**  .07  .34**  .52**  -.05  -  .63** | -.16  -.03  -.22*  .50**  .22  -.11  .52**  .61**  -.00  .21*  .31**  -.06  .63**  - |

*Note*. The top half of the diagonal presents the correlations between study variables for the Non-Offending Carer (NOC) group. The bottom half of the diagonal depicts the correlations between variables for the comparison parental group. DASS = Depression Anxiety Stress Scale; CPRS-SF = Child-Parent Relationship Scale-Short Form; CSI = Couples Satisfaction Inventory; SSQ6 = Social Support Questionnaire; FACES-IV = Family Adaptability and Cohesion Evaluation Scale

* *p* < .05. ** *p* < .01.

Table 2

*Summary of Traumatic Life Events Exposure*

| Variables | NOCs of abused children  (*n* = 92) | | Parents/Guardians of non-abused children  (*n* = 94) | | Statistical test  *x2* | *p* |
| --- | --- | --- | --- | --- | --- | --- |
|  | Directa  *n* (%) | Indirectb  *n* (%) | Direct  *n* (%) | Indirect  *n* (%) |
| Natural disaster  Fire or explosion  Transportation accident  Serious accident at work, home, or during recreational activity  Exposure to toxic substance  Physical assault  Assault with a weapon  Sexual assault  Other unwanted or uncomfortable sexual experience  Combat or exposure to a war-zone  Captivity  Life-threatening illness or injury  Severe human suffering  Sudden, violent death  Sudden, unexpected death of someone close  Serious injury, harm, or death you caused to someone else | 62 (67%)  24 (26%)  20 (22%)  20 (22%)  16 (17%)  40 (43%)  28 (30%)  21 (23%)  16 (17%)  10 (11%)  5 (5%)  25 (27%)  32 (35%)  10 (11%)  47 (51%)  3 (3%) | 30 (33%)  68 (74%)  72 (78%)  72 (78%)  76 (83%)  52 (57%)  64 (70%)  70 (77%)  76 (83%)  82 (89%)  87 (95%)  67 (73%)  60 (65%)  82 (89%)  45 (49%)  89 (97%) | 68 (72%)  9 (10%)  18 (19%)  8 (9%)  6 (6%)  26 (28%)  13 (14%)  6 (6%)  7 (7%)  5 (5%)  1 (1%)  8 (9%)  8 (9%)  2 (2%)  29 (31%)  3 (3%) | 26 (28%)  85 (90%)  76 (81%)  86 (91%)  88 (94%)  68 (72%)  81 (86%)  88 (94%)  87 (93%)  89 (95%)  92 (99%)  85 (91%)  85 (91%)  92 (98%)  65 (69%)  91 (97%) | .54  8.69  .19  6.36  5.40  5.08  7.46  10.34  4.24  1.93  2.80  10.88  18.71  5.89  7.88  .001 | .46  .003**  .66  .01*  .02*  .02*  .006**  .001**  .04*  .16  .09  .001**  < .001***  .01*  .005**  .98 |

aDirect = happened to me; bIndirect = witnessed, learned, not sure/doesn’t apply

* *p* < .05. ** *p* < .01. *** *p* < .001.
